# Supplementary material
Source: publisher figshare collection journal article supplement (https://gsajournals.figshare.com/ndownloader/files/12725165)
Supplement: Supplementary file 1 [file 12725165]

## Sheet: Table S9-transcripts
Table S10: Transcripts from published reference genomes mapped to Nanopore assemblies.
Species	Transcripts	Transcripts mapped to referene	percent of transcripts mapped to reference	Transcripts mapped to assembly	percent of transcripts mapped to assembly	% difference between reference and assembly
D. ananassae	21191	21158	0.998443	21067	0.994148	0.00429428
D. erecta	19592	19523	0.996478	19455	0.993007	0.0034708
D. mojavensis	20110	20046	0.996818	19821	0.985629	0.0111885
D. persimilis	16878	16632	0.985425	15666	0.928191	0.0572343
D. pseudoobscura	23456	23388	0.997101	23143	0.986656	0.0104451
D. sechellia	16469	16308	0.990224	16118	0.978687	0.0115368
D. simulans	24119	24077	0.998259	23136	0.959244	0.0390149
D. virilis	20548	20501	0.997713	20341	0.989926	0.00778665
D. willistoni	15182	15127	0.996377	14860	0.978791	0.0175866
D. yakuba	23304	23270	0.998541	23083	0.990517	0.00802437
Average	20084.9	20003	0.995538	19669	0.97848	0.0170582
